# Supplementary material for: Combination of bicarbonate and low temperature stress induces the biosynthesis of both arachidonic and docosahexaenoic acids in alkaliphilic microalgae Dunaliella salina HTBS
Source: Frontiers journal article supplement (doi:10.3389/fmars.2022.971441), 2022-10-04

**Supplemental data**

**Figure S1.** Effects of different combinations on the chlorophyll (A) and carotenoid content (B) in HTBS. Data were mean ± SD of three replicates.

**Figure S1.**


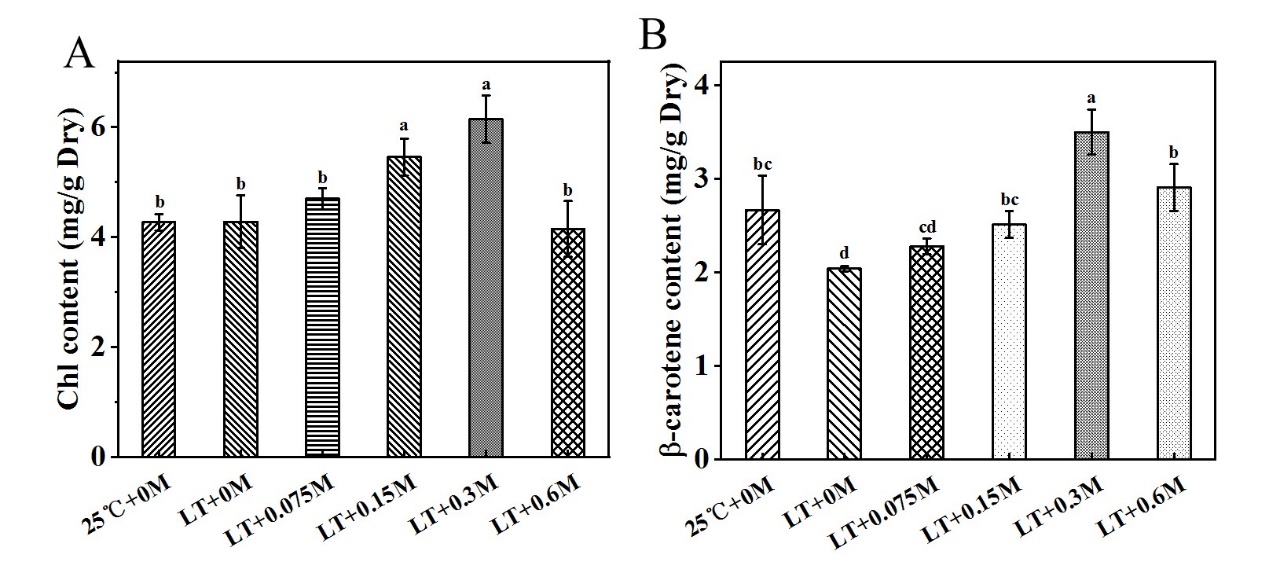

Supplement: Data_Sheet_1.docx [file Data_Sheet_1.docx]
